# Supplementary material for: TAO-DFT with the Polarizable Continuum Model
Source: MDPI journal article supplement (doi:10.3390/nano13101593), 2023-05-10
Supplement: s1 [file s1]

# Supplementary Information to: TAO-DFT with the Polarizable Continuum Model

Sonai Seenithurai<sup>1</sup> and Jeng-Da Chai<sup>1,2,3,\*</sup>

<sup>1</sup>*Department of Physics, National Taiwan University, Taipei 10617, Taiwan*

<sup>2</sup>*Center for Theoretical Physics and Center for Quantum Science and Engineering,  
National Taiwan University, Taipei 10617, Taiwan*

<sup>3</sup>*Physics Division, National Center for Theoretical Sciences, Taipei 10617, Taiwan*

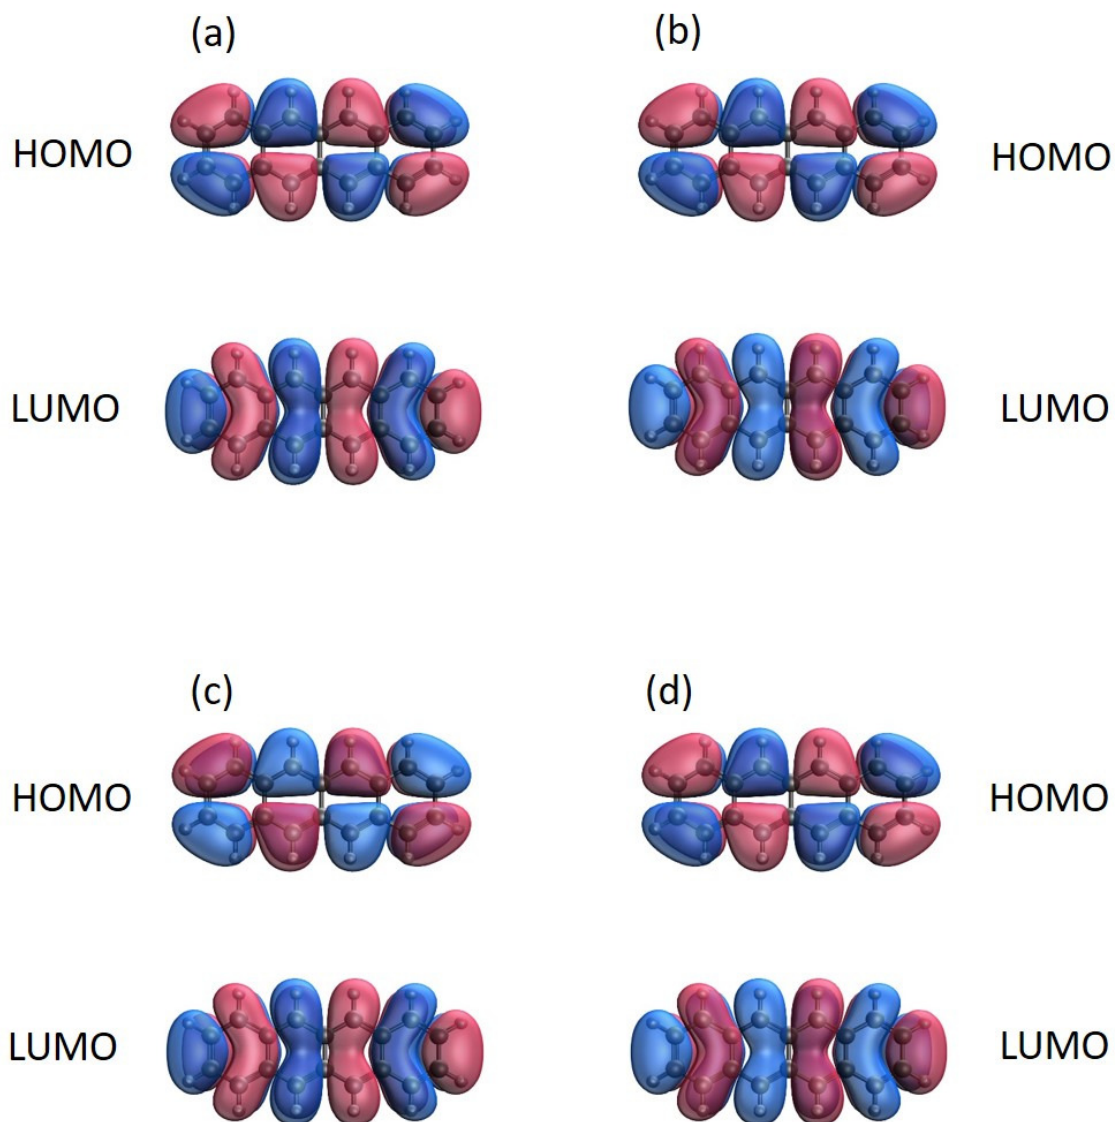

FIG. S1. Real-space representation of active TAO-orbitals (HOMO and LUMO) for the ground state of 4-acene in (a) the gas phase and in three different solvents: (b) toluene, (c) chlorobenzene, and (d) water, calculated using spin-restricted TAO-PCM (i.e., TAO-LDA / C-PCM), at an isovalue of  $0.02 \text{ e}/\text{\AA}^3$ .

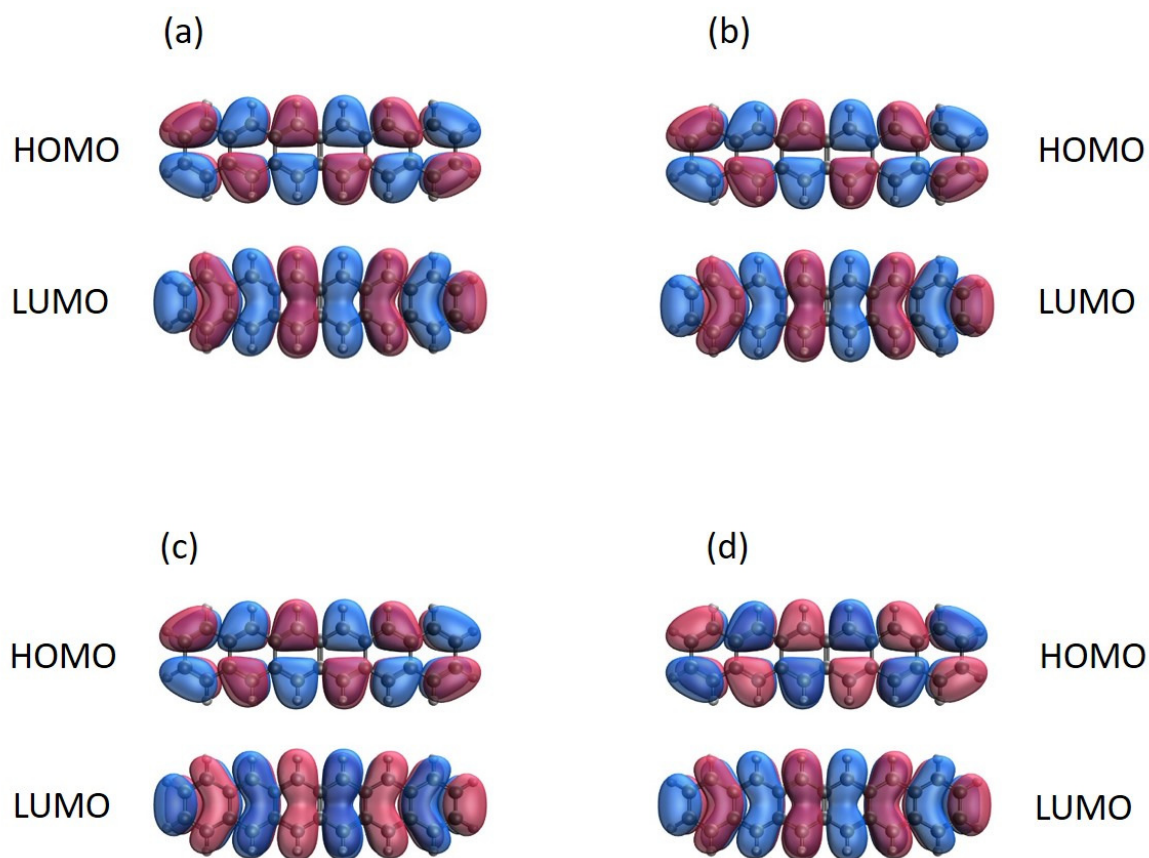

FIG. S2. Real-space representation of active TAO-orbitals (HOMO and LUMO) for the ground state of 6-acene in (a) the gas phase and in three different solvents: (b) toluene, (c) chlorobenzene, and (d) water, calculated using spin-restricted TAO-PCM (i.e., TAO-LDA / C-PCM), at an isovalue of  $0.02 \text{ e}/\text{\AA}^3$ .

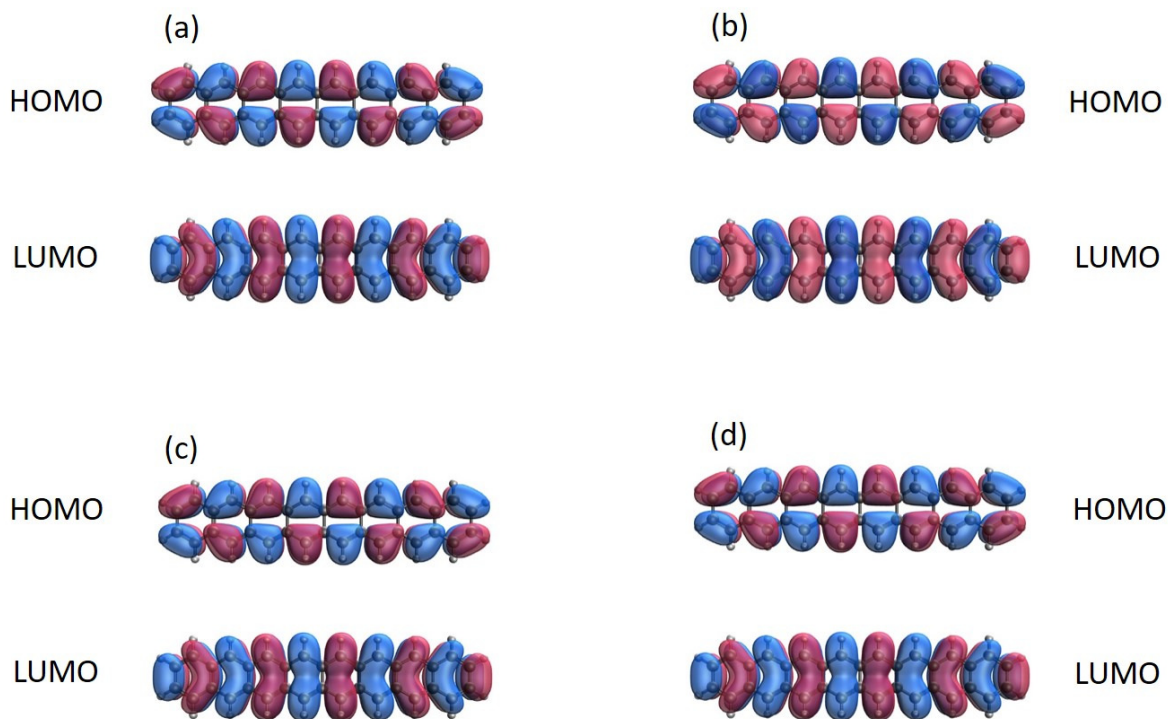

FIG. S3. Real-space representation of active TAO-orbitals (HOMO and LUMO) for the ground state of 8-acene in (a) the gas phase and in three different solvents: (b) toluene, (c) chlorobenzene, and (d) water, calculated using spin-restricted TAO-PCM (i.e., TAO-LDA / C-PCM), at an isovalue of  $0.02 \text{ e}/\text{\AA}^3$ .

TABLE S1. Singlet-triplet energy gap  $E_{\text{ST}}$  (in kcal/mol) of  $n$ -acene in the gas phase and in three different solvents (toluene, chlorobenzene, and water), calculated using spin-unrestricted TAO-PCM (i.e., TAO-LDA / C-PCM).

| $n$ | Gas Phase | Toluene | Chlorobenzene | Water |
|-----|-----------|---------|---------------|-------|
| 2   | 64.77     | 64.81   | 64.83         | 64.84 |
| 3   | 43.22     | 43.25   | 43.26         | 43.27 |
| 4   | 29.01     | 29.04   | 29.05         | 29.05 |
| 5   | 19.60     | 19.61   | 19.62         | 19.62 |
| 6   | 13.55     | 13.56   | 13.56         | 13.56 |
| 7   | 9.91      | 9.92    | 9.92          | 9.92  |
| 8   | 7.84      | 7.85    | 7.85          | 7.86  |
| 9   | 6.66      | 6.67    | 6.67          | 6.68  |
| 10  | 5.91      | 5.91    | 5.92          | 5.92  |
| 11  | 5.32      | 5.33    | 5.34          | 5.34  |
| 12  | 4.82      | 4.83    | 4.83          | 4.84  |
| 13  | 4.38      | 4.38    | 4.39          | 4.39  |
| 14  | 3.98      | 3.99    | 3.99          | 4.00  |
| 15  | 3.65      | 3.66    | 3.66          | 3.66  |
| 16  | 3.37      | 3.38    | 3.38          | 3.38  |
| 17  | 3.14      | 3.15    | 3.15          | 3.15  |
| 18  | 2.94      | 2.95    | 2.95          | 2.95  |
| 19  | 2.77      | 2.78    | 2.78          | 2.78  |
| 20  | 2.62      | 2.63    | 2.63          | 2.63  |

TABLE S2. Singlet-triplet energy gap  $E_{\text{ST}}$  (in kcal/mol) of  $n$ -acene in the gas phase and in three different solvents (toluene, chlorobenzene, and water), calculated using spin-unrestricted KS-PCM (i.e., KS-LDA / C-PCM).

| $n$ | Gas Phase | Toluene | Chlorobenzene | Water |
|-----|-----------|---------|---------------|-------|
| 2   | 65.19     | 65.23   | 65.25         | 65.26 |
| 3   | 43.40     | 43.43   | 43.44         | 43.45 |
| 4   | 29.06     | 29.08   | 29.09         | 29.10 |
| 5   | 19.20     | 19.22   | 19.22         | 19.23 |
| 6   | 12.16     | 12.17   | 12.17         | 12.17 |
| 7   | 6.98      | 6.98    | 6.98          | 6.98  |
| 8   | 3.07      | 3.07    | 3.07          | 3.06  |
| 9   | 0.99      | 0.98    | 0.98          | 0.98  |
| 10  | 0.53      | 0.53    | 0.53          | 0.52  |
| 11  | 0.86      | 0.87    | 0.87          | 0.87  |
| 12  | 1.59      | 1.61    | 1.61          | 1.62  |
| 13  | 2.31      | 2.34    | 2.36          | 2.55  |
| 14  | 3.47      | 3.52    | 3.51          | 3.53  |
| 15  | 4.34      | 4.36    | 4.49          | 4.39  |
| 16  | 4.43      | 4.45    | 4.46          | 4.47  |
| 17  | 3.90      | 3.91    | 3.92          | 3.92  |
| 18  | 3.01      | 3.00    | 3.00          | 2.99  |
| 19  | 1.96      | 1.52    | 1.85          | 1.93  |
| 20  | 1.30      | 1.28    | 1.28          | 1.27  |

TABLE S3. Vertical ionization potential  $IP_v$  (in eV) for the ground state of  $n$ -acene in the gas phase and in three different solvents (toluene, chlorobenzene, and water), calculated using spin-unrestricted TAO-PCM (i.e., TAO-LDA / C-PCM).

| $n$ | Gas Phase | Toluene | Chlorobenzene | Water |
|-----|-----------|---------|---------------|-------|
| 2   | 7.81      | 6.67    | 6.20          | 5.88  |
| 3   | 7.00      | 6.00    | 5.58          | 5.30  |
| 4   | 6.46      | 5.55    | 5.17          | 4.91  |
| 5   | 6.07      | 5.23    | 4.89          | 4.65  |
| 6   | 5.79      | 5.01    | 4.69          | 4.47  |
| 7   | 5.59      | 4.86    | 4.56          | 4.36  |
| 8   | 5.44      | 4.76    | 4.48          | 4.29  |
| 9   | 5.33      | 4.69    | 4.42          | 4.24  |
| 10  | 5.23      | 4.63    | 4.38          | 4.21  |
| 11  | 5.15      | 4.58    | 4.34          | 4.18  |
| 12  | 5.08      | 4.53    | 4.31          | 4.15  |
| 13  | 5.01      | 4.49    | 4.28          | 4.13  |
| 14  | 4.96      | 4.46    | 4.25          | 4.11  |
| 15  | 4.91      | 4.43    | 4.23          | 4.10  |
| 16  | 4.86      | 4.40    | 4.21          | 4.08  |
| 17  | 4.82      | 4.37    | 4.19          | 4.07  |
| 18  | 4.78      | 4.35    | 4.18          | 4.06  |
| 19  | 4.75      | 4.33    | 4.16          | 4.05  |
| 20  | 4.71      | 4.31    | 4.15          | 4.04  |

TABLE S4. Vertical electron affinity  $EA_v$  (in eV) for the ground state of  $n$ -acene in the gas phase and in three different solvents (toluene, chlorobenzene, and water), calculated using spin-unrestricted TAO-PCM (i.e., TAO-LDA / C-PCM).

| $n$ | Gas Phase | Toluene | Chlorobenzene | Water |
|-----|-----------|---------|---------------|-------|
| 2   | -0.62     | 0.59    | 1.10          | 1.46  |
| 3   | 0.28      | 1.36    | 1.82          | 2.15  |
| 4   | 0.90      | 1.88    | 2.31          | 2.60  |
| 5   | 1.34      | 2.25    | 2.64          | 2.92  |
| 6   | 1.66      | 2.50    | 2.87          | 3.13  |
| 7   | 1.89      | 2.68    | 3.03          | 3.28  |
| 8   | 2.06      | 2.81    | 3.14          | 3.37  |
| 9   | 2.19      | 2.90    | 3.21          | 3.43  |
| 10  | 2.30      | 2.97    | 3.26          | 3.48  |
| 11  | 2.39      | 3.03    | 3.31          | 3.51  |
| 12  | 2.48      | 3.08    | 3.35          | 3.54  |
| 13  | 2.55      | 3.13    | 3.39          | 3.57  |
| 14  | 2.61      | 3.17    | 3.42          | 3.59  |
| 15  | 2.67      | 3.21    | 3.44          | 3.61  |
| 16  | 2.72      | 3.24    | 3.47          | 3.63  |
| 17  | 2.77      | 3.27    | 3.49          | 3.65  |
| 18  | 2.81      | 3.29    | 3.51          | 3.66  |
| 19  | 2.85      | 3.32    | 3.52          | 3.67  |
| 20  | 2.89      | 3.34    | 3.54          | 3.68  |

TABLE S5. Fundamental gap  $E_g$  (in eV) for the ground state of  $n$ -acene in the gas phase and in three different solvents (toluene, chlorobenzene, and water), calculated using spin-unrestricted TAO-PCM (i.e., TAO-LDA / C-PCM).

| $n$ | Gas Phase | Toluene | Chlorobenzene | Water |
|-----|-----------|---------|---------------|-------|
| 2   | 8.43      | 6.08    | 5.10          | 4.42  |
| 3   | 6.73      | 4.64    | 3.76          | 3.16  |
| 4   | 5.56      | 3.67    | 2.86          | 2.31  |
| 5   | 4.73      | 2.98    | 2.24          | 1.73  |
| 6   | 4.13      | 2.51    | 1.82          | 1.34  |
| 7   | 3.69      | 2.18    | 1.53          | 1.08  |
| 8   | 3.38      | 1.95    | 1.35          | 0.92  |
| 9   | 3.13      | 1.79    | 1.21          | 0.81  |
| 10  | 2.93      | 1.66    | 1.11          | 0.73  |
| 11  | 2.76      | 1.55    | 1.03          | 0.67  |
| 12  | 2.60      | 1.45    | 0.96          | 0.61  |
| 13  | 2.46      | 1.36    | 0.89          | 0.56  |
| 14  | 2.34      | 1.29    | 0.83          | 0.52  |
| 15  | 2.23      | 1.22    | 0.78          | 0.48  |
| 16  | 2.13      | 1.16    | 0.74          | 0.45  |
| 17  | 2.05      | 1.10    | 0.70          | 0.42  |
| 18  | 1.97      | 1.06    | 0.67          | 0.40  |
| 19  | 1.89      | 1.01    | 0.64          | 0.38  |
| 20  | 1.83      | 0.97    | 0.61          | 0.36  |

TABLE S6. Symmetrized von Neumann entropy  $S_{\text{vN}}$  for the ground state of  $n$ -acene in the gas phase and in three different solvents (toluene, chlorobenzene, and water), calculated using spin-unrestricted TAO-PCM (i.e., TAO-LDA / C-PCM).

| $n$ | Gas Phase | Toluene | Chlorobenzene | Water |
|-----|-----------|---------|---------------|-------|
| 2   | 0.00      | 0.00    | 0.00          | 0.00  |
| 3   | 0.06      | 0.06    | 0.06          | 0.06  |
| 4   | 0.30      | 0.30    | 0.30          | 0.29  |
| 5   | 0.80      | 0.80    | 0.80          | 0.80  |
| 6   | 1.49      | 1.49    | 1.49          | 1.49  |
| 7   | 2.17      | 2.17    | 2.17          | 2.17  |
| 8   | 2.68      | 2.68    | 2.68          | 2.68  |
| 9   | 3.03      | 3.03    | 3.04          | 3.04  |
| 10  | 3.33      | 3.33    | 3.33          | 3.33  |
| 11  | 3.63      | 3.63    | 3.63          | 3.63  |
| 12  | 3.96      | 3.96    | 3.96          | 3.96  |
| 13  | 4.33      | 4.33    | 4.33          | 4.33  |
| 14  | 4.71      | 4.71    | 4.71          | 4.71  |
| 15  | 5.10      | 5.10    | 5.10          | 5.10  |
| 16  | 5.49      | 5.49    | 5.49          | 5.49  |
| 17  | 5.88      | 5.87    | 5.87          | 5.87  |
| 18  | 6.25      | 6.25    | 6.25          | 6.25  |
| 19  | 6.63      | 6.63    | 6.63          | 6.62  |
| 20  | 7.01      | 7.00    | 7.00          | 7.00  |
